# Supplementary material
Source: PubMed Central journal article supplement (PMC4615192)

Supplemental Figure 1: Genetic recombination in *Kras.Smad4*<sup>-/-</sup> mouse tumors.

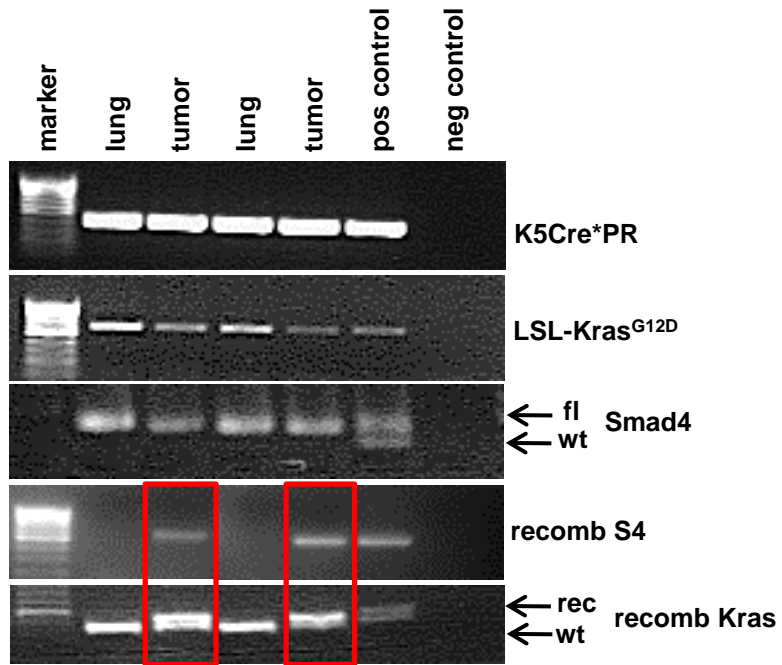

Supplemental Figure 2: Confirmation of reduced Smad4 expression in cell lines.

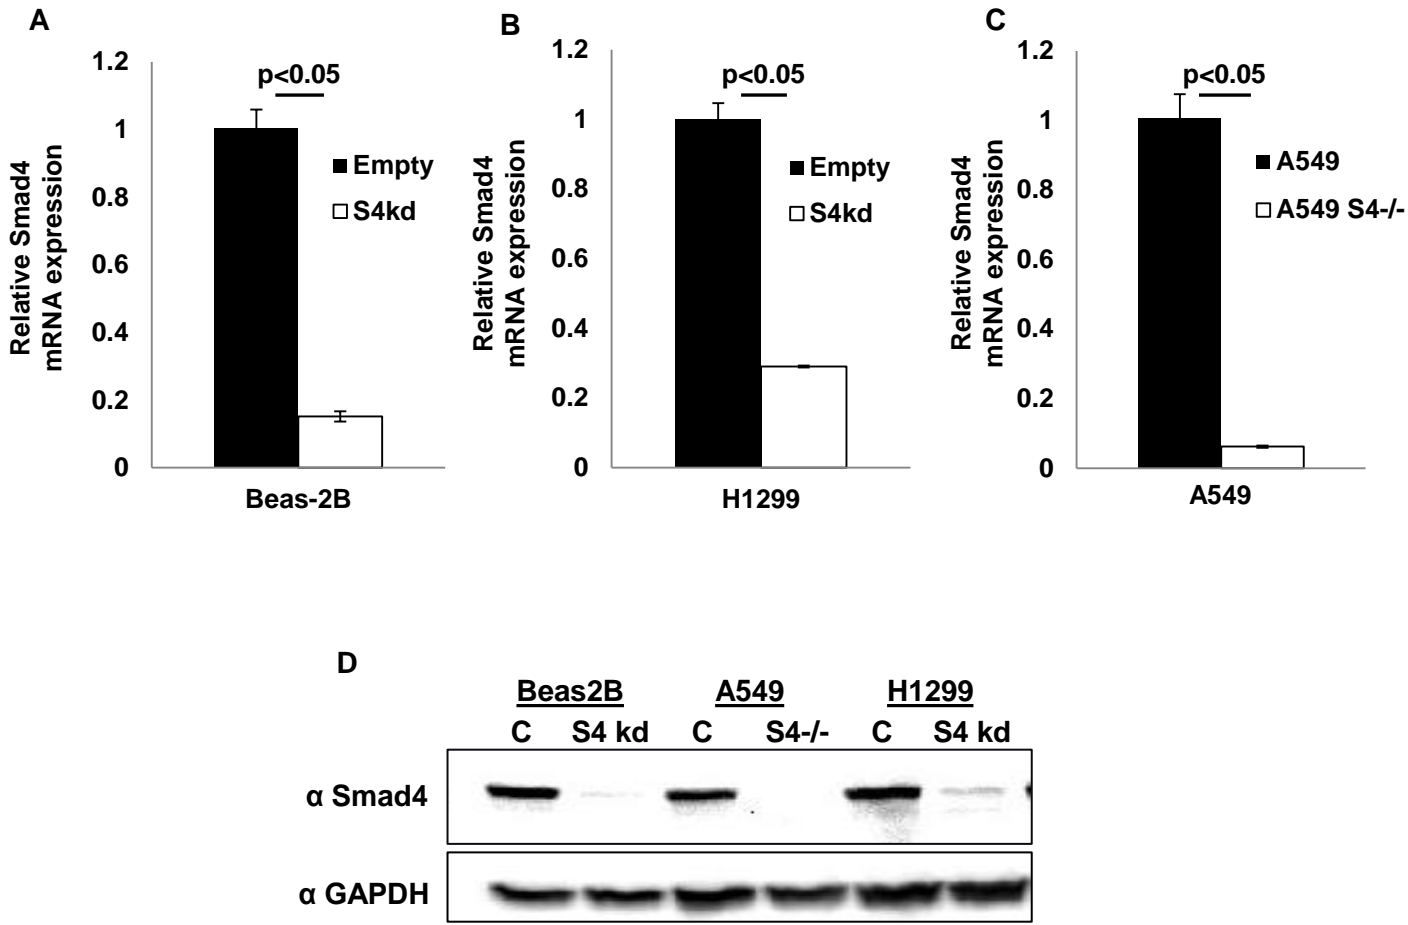

Supplemental Figure 3: pH2AX staining in chemotherapy treated A549 cells

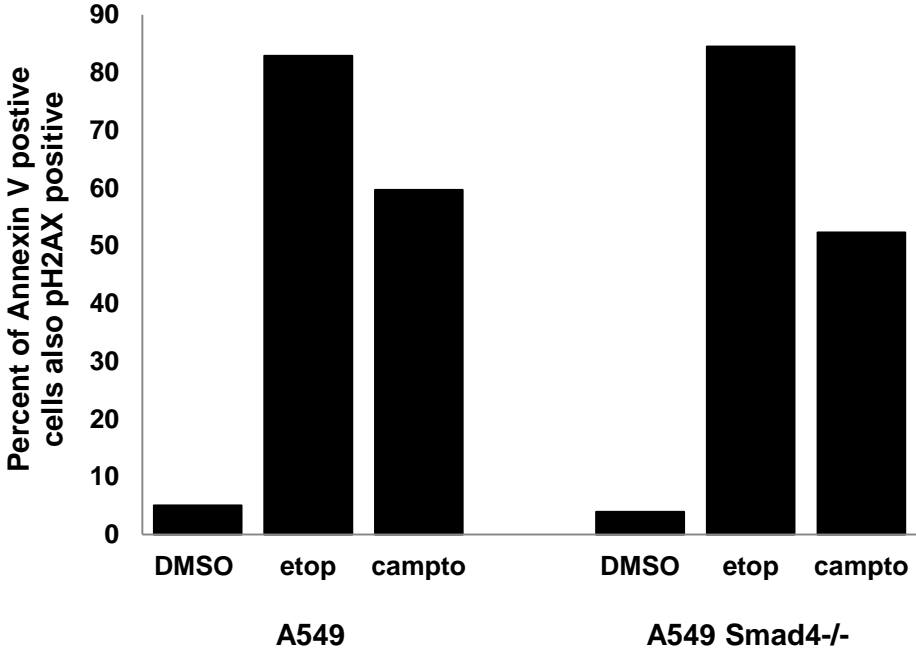

Supplement: NIHMS671254-supplement-1.pdf [file NIHMS671254-supplement-1.pdf]
