# Supplementary material
Source: PubMed Central journal article supplement (PMC4615192)
Supplement: NIHMS671254-supplement-2.pdf [file NIHMS671254-supplement-2.pdf]

## SUPPLEMENTAL FIGURE LEGENDS

**Supplemental Figure 1: Genetic recombination in *Kras.Smad4*<sup>-/-</sup> mouse tumors.** DNA was isolated from tumor and grossly normal lung from two *K5CrePR<sup>\*</sup>.LSL-Kras<sup>G12D</sup>.Smad4<sup>fl/fl</sup>* animals. Genotyping from lung and tumor DNA was identical; however the recombinant *Smad4* and *Kras* alleles were detected only in tumor.

**Supplemental Figure 2: Confirmation of reduced *Smad4* expression in cell lines.** (A-C) Reduced *Smad4* mRNA expression in Beas2B airway epithelial cells and H1299 cells with a stable *Smad4* knockdown and A549 lung adenocarcinoma cells with a Zn finger engineered *Smad4* deletion. (D) Reduced *Smad4* protein levels in each cell line.

**Supplemental Figure 3: *pH2AX* and apoptosis in chemotherapy treated A549 cells.**

Increased *pH2AX* staining in Annexin V positive cells after treatment with 10 $\mu$ M camptothecin or 100 $\mu$ M etoposide. Cells were simultaneously stained for apoptosis (Annexin V) and *pH2AX* then assayed by flow cytometry as described in the Methods.
