# Supplementary material
Source: PubMed Central journal article supplement (PMC4615192)
Supplement: NIHMS671254-supplement-3.pdf [file NIHMS671254-supplement-3.pdf]

**Supplemental Table 1: Human Sample Characteristics**

|                              | all cases     |          | w/IHC data |   | w/ mRNA data |   | w/ copy number data |   | w/ methylation data |   |
|------------------------------|---------------|----------|------------|---|--------------|---|---------------------|---|---------------------|---|
|                              | 186           |          | 168        |   | 48           |   | 95                  |   | 70                  |   |
| <b>Age<sup>1</sup></b>       | median        | 63       | 62         |   | 67           |   | 67                  |   | 67                  |   |
|                              | range (28-89) |          | (28-89)    |   | (44-84)      |   | (44-84)             |   | (44-84)             |   |
| <b>Gender<sup>2</sup></b>    |               | %        |            | % |              | % |                     | % |                     | % |
|                              | male          | 121 (65) | 110 (65)   |   | 27 (56)      |   | 37 (39)             |   | 41 (59)             |   |
|                              | female        | 64 (34)  | 57 (34)    |   | 21 (44)      |   | 58 (61)             |   | 29 (41)             |   |
| <b>Smoking<sup>3</sup></b>   | current       | 24 (13)  | 20 (12)    |   | 12 (25)      |   | 24 (25)             |   | 21 (30)             |   |
|                              | former        | 49 (26)  | 36 (21)    |   | 18 (38)      |   | 46 (48)             |   | 38 (54)             |   |
|                              | never         | 12 (6)   | 11 (7)     |   | 6 (13)       |   | 11 (12)             |   | 8 (12)              |   |
|                              | unknown       | 101 (54) | 100 (60)   |   | 12 (25)      |   | 14 (15)             |   | 3 (4)               |   |
| <b>Histology<sup>4</sup></b> | Adeno-BAC     | 70 (38)  | 59 (35)    |   | 19 (40)      |   | 43 (45)             |   | 41 (59)             |   |
|                              | SCC           | 109 (59) | 102 (61)   |   | 25 (52)      |   | 43 (45)             |   | 26 (37)             |   |
|                              | other         | 7 (4)    | 7 (4)      |   | 4 (8)        |   | 5 (5)               |   | 3 (4)               |   |
| <b>T stage<sup>5</sup></b>   | T1            | 41 (22)  | 36 (21)    |   | 17 (35)      |   | 30 (32)             |   | 25 (36)             |   |
|                              | T2            | 105 (56) | 96 (57)    |   | 24 (50)      |   | 51 (54)             |   | 33 (47)             |   |
|                              | T3            | 33 (18)  | 31 (18)    |   | 7 (15)       |   | 9 (9)               |   | 8 (11)              |   |
|                              | T4            | 5 (3)    | 3 (2)      |   | 0 (0)        |   | 4 (4)               |   | 4 (6)               |   |
|                              | Tx            | 2 (1)    | 2 (1)      |   | 0 (0)        |   | 0 (0)               |   | 0 (0)               |   |
| <b>N stage</b>               | N0            | 109 (59) | 98 (58)    |   | 31 (65)      |   | 64 (67)             |   | 48 (69)             |   |
|                              | N1            | 34 (18)  | 30 (18)    |   | 13 (27)      |   | 34 (36)             |   | 15 (21)             |   |
|                              | N2            | 28 (15)  | 26 (15)    |   | 4 (8)        |   | 7 (7)               |   | 7 (10)              |   |
|                              | N3            | 13 (7)   | 12 (7)     |   | 0 (0)        |   | 0 (0)               |   | 0 (0)               |   |
|                              | Nx            | 2 (1)    | 2 (1)      |   | 0 (0)        |   | 0 (0)               |   | 0 (0)               |   |
| <b>M stage<sup>6</sup></b>   | M0            | 170 (91) | 152 (90)   |   | 46 (96)      |   | 90 (95)             |   | 65 (93)             |   |
|                              | M1            | 16 (9)   | 15 (9)     |   | 2 (4)        |   | 5 (5)               |   | 5 (7)               |   |
| <b>Stage<sup>7</sup></b>     | I             | 83 (45)  | 76 (45)    |   | 26 (54)      |   | 49 (52)             |   | 33 (47)             |   |
|                              | II            | 46 (25)  | 40 (24)    |   | 15 (31)      |   | 29 (31)             |   | 21 (30)             |   |
|                              | III           | 39 (21)  | 34 (20)    |   | 5 (10)       |   | 12 (13)             |   | 11 (16)             |   |
|                              | IV            | 16 (9)   | 16 (10)    |   | 2 (4)        |   | 5 (5)               |   | 5 (7)               |   |
|                              | unknown       | 2 (1)    | 2 (1)      |   | 0 (0)        |   | 0 (0)               |   | 0 (0)               |   |
| <b>Differentiaion</b>        | well          | 32 (17)  | 29 (17)    |   | 8 (17)       |   | 21 (22)             |   | 19 (27)             |   |
|                              | mod           | 73 (39)  | 65 (39)    |   | 20 (42)      |   | 31 (33)             |   | 18 (26)             |   |
|                              | poor          | 81 (44)  | 74 (44)    |   | 20 (42)      |   | 43 (45)             |   | 33 (47)             |   |
| <b>Survival<sup>8</sup></b>  | alive         | 38 (20)  | 33 (20)    |   | 22 (46)      |   | 37 (39)             |   | 40 (57)             |   |
|                              | dead          | 47 (25)  | 36 (21)    |   | 14 (29)      |   | 47 (49)             |   | 30 (43)             |   |
|                              | unknown       | 101 (54) | 99 (59)    |   | 12 (25)      |   | 11 (12)             |   | 0 (0)               |   |
