# Supplementary material
Source: PubMed Central journal article supplement (PMC4615192)
Supplement: NIHMS671254-supplement-4.pdf [file NIHMS671254-supplement-4.pdf]

## **SUPPLEMENTAL TABLE LEGEND**

### **Supplemental Table1: Demographic and pathologic data of human NSCLC samples analyzed for Smad4 immunostaining, expression, copy loss, and promoter methylation.**

Unless otherwise noted data are expressed as raw numbers with percentages shown in parenthesis; percentages may not total 100 due to rounding. As expected with resected lung cancer samples there is a preponderance of early stage disease. Because banking protocols included patients from the Veterans Administration, there is a preponderance of both male subjects and squamous cell carcinoma histology. NOTES: (1) Age was unavailable on 22 samples; (2) Gender was unavailable on 1 sample; (3) Never smokers were defined as having smoked fewer than 10 pack-years in their lifetime; (4) Includes 2 large cell carcinomas, 2 adenosquamous carcinomas, 2 pleomorphic carcinomas, and 1 mucoepithelioid carcinoma; (5) Two samples clinically treated as synchronous primaries were scored as the T stage of the highest tumor; (6) Twenty two resected cancers were assumed to be M0 although this could not be independently confirmed in the medical record; (7) Clinical stage was determined according to the 2009 consensus guidelines (Detterbeck FC, Boffa DJ, Tanoue LT. The new lung cancer staging system. Chest 2009;136: 260-71); (8) Since survival was determined using the social security death index (SSDI), this could only be assessed in subjects with available social security numbers; if a death record could not be located in the SSDI after searching by social security number and name/date of birth, subjects were assumed to be alive.
